## Prognostic role of N-Acetylgalactosaminyltransferase 10 in metastatic renal cell carcinoma

Li Liu<sup>1,\*</sup>, Ying Xiong<sup>1,\*</sup>, Wei Xi<sup>1,\*</sup>, Jiajun Wang<sup>1</sup>, Yang Qu<sup>1</sup>, Zhiyuan Lin<sup>1</sup>, Xiang Chen<sup>1</sup>, Jiayi Yao<sup>1</sup>, Jiejie Xu<sup>2</sup>, Jianming Guo<sup>1</sup>

<sup>1</sup>Department of Urology, Zhongshan Hospital, Fudan University, Shanghai 200032, China

<sup>2</sup>Department of Biochemistry and Molecular Biology, School of Basic Medical Sciences, Fudan University, Shanghai 200032, China

\*These authors contributed equally to this work

**Correspondence to:** Jiejie Xu, email: jjxufdu@fudan.edu.cn  
Jianming Guo, email: guo.jianming@zs-hospital.sh.cn

**Keywords:** metastatic renal cell carcinoma, GALNT10, prognosis, biomarker, tyrosine kinase inhibitors

**Received:** November 11, 2016

**Accepted:** January 11, 2017

**Published:** January 21, 2017

### ABSTRACT

**Background and Purpose:** A previous study demonstrated that GALNT10 affects the sensitivity of cancer cells to tyrosine kinase inhibitor (TKI) therapy. The aim of this study was to assess whether GALNT10 holds a prognostic role in metastatic renal cell carcinoma (mRCC) patients treated with TKI agents.

**Results:** GALNT10 had no statistical correlation with any other clinicopathological parameters except for route of gaining samples ( $P = 0.001$ ) and Heng's risk stratification ( $P = 0.011$ ). Patients with high level of GALNT10 had significantly shorter overall survival (OS) ( $P < 0.001$ ) and progression-free survival (PFS) ( $P = 0.002$ ). Importantly, this relationship existed in OS and PFS analyses in sunitinib-treated patients and in OS analyses in sorafenib-treated patients ( $P = 0.024$ ). In contrast to sorafenib group, percentage of partial response (PR) and stable disease (SD) were higher in sunitinib group, while percentage of progression disease (PD) was much lower. Univariate and multivariate analyses identified that GALNT10 was an independent prognostic factor for OS (HR = 1.938,  $P = 0.014$ ), not for PFS (HR = 1.532,  $P = 0.065$ ), in mRCC. Incorporating it into Heng's risk model could sharpen its efficacy in distinguishing patients with potential higher risk.

**Materials and Methods:** We retrospectively enrolled 138 mRCC patients treated with sunitinib or sorafenib at Zhongshan Hospital, Shanghai, China. A total of 111 valid cases were finally applied for analyses.

**Conclusions:** These findings suggest that GALNT10 could be applied as a prognostic marker for OS in mRCC patients.

### INTRODUCTION

Renal cell carcinoma (RCC) accounts for 2–3% of malignancies in adults [1]. Although the use of modern abdominal imaging has led to an increase in localized RCC proportion at initial diagnosis [2], unexpected progression to metastasis often happens [3, 4]. Instead of traditional immunotherapy using IL-2 and IFN- $\gamma$  for mRCC patients with limited benefit [5, 6], tyrosine kinase inhibitors (TKIs) therapy has shown significant survival extension of metastatic clear cell RCC (ccRCC) patients [7, 8]. Due to the various reactions to TKIs among patients, MSKCC and

Heng's risk model are chronologically raised to stratify patients with different risks [9]. Due to the limitations of current risk models, researchers considered that adding molecular biomarker may be of help [10].

Aberrant glycosylation is common and representative in cancers including RCC [11]. They participate in malignant transformations and progression and many of them, such as carbohydrate antigens (CA)-125, CA-129, glycoprotein PSA, have been commonly applied as tumor markers in clinical practice. Most of the carbohydrate antigens are mucin-type O-linked glycans which were initiated by N-acetylgalactosaminyltransferases

(GALNTs) [12]. So far twenty members of GALNTs have been identified, including GALNT1-14 and GALNTL1-6, and many are closely connected with malignancies [11, 12]. For example, GALNT3 expression level has been identified to be significantly associated with tumor behavior or prognosis in pancreas adenocarcinoma, renal cell carcinoma and gastric cancer [13–16]; GALNT6 is an independent indicator in mammary cancer [17]. GALNT10 stays low in normal renal tissue, but elevates in kidney cancer [18]. Patients with higher tumoral GALNT10 had a poorer OS and PFS in our previous study [18]. GALNT10 could enhance EGFR membrane retention via O-glycosylation. GALNT10 silencing increases sorafenib sensitivity of hepatoma cells [19]. EGFR also functions in renal cell carcinoma and is involved in the progression of renal cell carcinoma [20]. In this study, we sought to set a further step to assess whether GALNT10 holds a prognostic role in mRCC patients treated with TKI agents.

## RESULTS

### Characteristics and association with GALNT10 level

The baseline characteristics of this cohort were shown in Table 1. All patients were diagnosed with metastatic renal cell carcinoma. Most of the patients were male (71.2%) and clear cell subtype accounted for 89%. In Heng's risk stratification model, 60 cases (54.1%) were in the intermediate risk group, while 23 (20.7%) and 28 (25.2%) were classified into favorable risk group and poor risk group, respectively. GALNT10 level was separated into low and high level by median cut-off (Supplementary Figure 1). Association between baseline characteristics and GALNT10 level was exhibited in the same table. It is obvious that GALNT10 was associated with route of gaining samples ( $P = 0.001$ ) and Heng's risk ( $P = 0.011$ ). Other characteristics were not statistically associated with GALNT10.

### Impact of GALNT10 on survival of mRCC patients

Sixty-four percent of patients (71/111) died in this cohort. To assess whether GALNT10 was associated with clinical outcome, Kaplan-Meier analyses were done. As shown in Figure 1, GALNT10 was significantly correlated with OS and PFS ( $P < 0.001$  and  $= 0.002$ , Figure 1A and 1B), in which high GALNT10 leveled patients experienced more death or disease progression. Meanwhile, high level of GALNT10 maintained its correlation with poorer OS both in low (Fuhrman 1 + 2,  $P = 0.015$ ) and high (Fuhrman 3 + 4,  $P = 0.012$ ) grade, but lost the significance in Fuhrman-based PFS subgroup analyses.

Heng's risk stratification classified mRCC patients into three leveled groups. In this cohort, 20.7% (23/111),

54.1% (60/111) and 25.2% (28/111) of the cases were classified into favorable, intermediate and poor risk groups. GALNT10 exhibited its stratification ability only in intermediate risk patients in OS ( $P = 0.024$ , Figure 2). Interestingly and inspiringly, GALNT10 was significantly related with OS and PFS in patients treated with sunitinib ( $P = 0.001$  and  $= 0.011$ , Figure 3A and 3B), and was only related with OS, not PFS in sorafenib group ( $P = 0.037$  and  $= 0.104$ , Figure 3D and 3E). In GALNT10 low expressed patients, percentage of partial response (PR 70.0%) and stable disease (SD 57.9%) were higher in sunitinib group, compared with sorafenib (PR 57.1%, SD 42.1%), while percentage of progression disease (PD) was much lower in sunitinib group (15.4%) in contrast to sorafenib group (40%) Figure 3C, 3F. Supplementary Table 2 exhibited the distribution of best response in sunitinib and sorafenib subgroups, which indicated a much more significant discrimination in sunitinib-treated patients ( $P = 0.005$ ). These data indicated that low GALNT10 level was potentially related with sunitinib response.

### Prognostic value of GALNT10 in mRCC

To further determine the prognostic value of GALNT10, we applied univariate and multivariate Cox proportional hazard models to evaluate the HR and 95% CI. In univariate analyses, GALNT10 level together with histologic type, initial TNM stage, metastatic number and Heng risk group were associated with OS and PFS (Supplementary Table 1). In multivariate analyses, histologic type (HR = 2.395,  $P = 0.003$ ), Heng's risk stratification ( $P < 0.001$ ) and GALNT10 (HR = 1.938,  $P = 0.014$ ) were independent factors for OS. Interestingly, number of metastatic sites was independently associated with PFS (HR = 2.071,  $P = 0.002$ ), while GALNT10 lost its significance, as  $P$  value was 0.065 Table 2. ROC analyses was further used to assess whether GALNT10 could improve current Heng's risk model. Exhibited in Figure 4, AUC of novel combined model was larger than Heng's risk model or GALNT10 alone both in 1-year and 3-year comparison (Figure 4A and 4D). TKI agents-based stratified comparison resulted in similar results. These findings demonstrated that GALNT10 was an independent prognostic factor for mRCC, and combining it with Heng's risk model sharpened the predictive efficacy.

## DISCUSSION

In this study, we sought to explore the prognostic role of GALNT10 in mRCC patients treated with TKIs. It is obvious that high level of GALNT10 was associated with shorter OS and PFS. Meanwhile, multivariate analyses revealed that GALNT10 level was an independent prognostic factor for OS, not PFS, of mRCC patients.

The polypeptide N-acetylgalactosaminyltransferases (GALNTs) family initiates mucin-type O-glycosylation [21].

**Table 1: Clinical characteristics of patients according to GALNT10 expression**

| Characteristics                 | Patients |      | GALNT10 expression |      | P-value |
|---------------------------------|----------|------|--------------------|------|---------|
|                                 | n        | %    | low                | high |         |
| All patients                    | 111      | 100  | 55                 | 56   |         |
| Age                             |          |      |                    |      | 0.297   |
| ≤ 59                            | 56       | 50.5 | 25                 | 31   |         |
| > 59                            | 55       | 49.5 | 30                 | 25   |         |
| Tumor size                      |          |      |                    |      | 0.804‡  |
| ≤ 4 cm                          | 18       | 16.2 | 11                 | 7    |         |
| > 4 and ≤ 7 cm                  | 49       | 44.1 | 20                 | 29   |         |
| > 7 and ≤ 10 cm                 | 30       | 27.0 | 16                 | 14   |         |
| > 10 cm                         | 14       | 12.6 | 8                  | 6    |         |
| Gender                          |          |      |                    |      | 0.952†  |
| Female                          | 32       | 28.8 | 16                 | 16   |         |
| Male                            | 79       | 71.2 | 39                 | 40   |         |
| Prior nephrectomy               |          |      |                    |      |         |
| Yes                             | 111      | 100  |                    |      |         |
| No                              | 0        | 0    |                    |      |         |
| Diagnosis                       |          |      |                    |      |         |
| Metastatic renal cell carcinoma | 111      | 100  |                    |      |         |
| Route of gaining samples        |          |      |                    |      | 0.001†  |
| Curative surgery                | 53       | 47.7 | 35                 | 18   |         |
| Cytoreductive surgery           | 58       | 52.3 | 20                 | 38   |         |
| Histology                       |          |      |                    |      | 0.063†  |
| Clear-cell                      | 89       | 80.2 | 48                 | 41   |         |
| Non-clear cell                  | 22       | 19.8 | 7                  | 15   |         |
| Initial TNM stage               |          |      |                    |      | 0.220†  |
| I–III                           | 52       | 46.8 | 27                 | 25   |         |
| IV                              | 59       | 53.2 | 28                 | 31   |         |
| Fuhrman grade                   |          |      |                    |      | 0.395‡  |
| 1                               | 2        | 1.8  | 2                  | 0    |         |
| 2                               | 54       | 48.6 | 26                 | 28   |         |
| 3                               | 41       | 36.9 | 21                 | 20   |         |
| 4                               | 7        | 6.3  | 4                  | 3    |         |
| Heng's risk model               |          |      |                    |      | 0.011‡  |
| Favorable risk                  | 23       | 20.7 | 16                 | 7    |         |
| Intermediate risk               | 60       | 54.1 | 31                 | 29   |         |
| Poor risk                       | 28       | 25.2 | 8                  | 20   |         |
| Number of disease sites         |          |      |                    |      | 0.727†  |
| 1                               | 77       | 69.4 | 39                 | 38   |         |
| ≥ 2                             | 34       | 30.6 | 16                 | 18   |         |
| Sites of disease                |          |      |                    |      |         |
| lung                            | 83       | 74.8 |                    |      |         |
| bone                            | 18       | 16.2 |                    |      |         |
| brain                           | 2        | 1.8  |                    |      |         |
| other sites                     | 13       | 11.7 |                    |      |         |
| Treatment                       |          |      |                    |      | 0.591†  |
| sunitinib                       | 74       | 66.7 | 38                 | 36   |         |
| sorafenib                       | 37       | 33.3 | 17                 | 20   |         |

† $\chi^2$  test or Fisher's exact test, ‡Cochran-Mantel-Haenszel  $\chi^2$  test, P-value < 0.05 was regarded as statistically significant. Abbreviations: KPS, Karnofsky performance status.

It has been reported to be associated with malignancy in many studies. High level of GALNT3 was closely associated with poor disease-specific survival in renal cell carcinoma with a significant hazard ratio (HR = 3.43) [14]. GALNT10 as a member of GALNTs family was first reported in 2002 [22], but was little studied in the literature. In one previous study, Wu et al found it an adverse indicator for ccRCC [18]. In the present study, GALNT10 was more prevalent in Heng's high risk patients, and was not associated with other parameters. These findings might indicate a similar role of GALNT10 to Heng's risk stratification. Further multivariate analyses confirmed this hypothesis in mRCC (HR = 1.938,  $P = 0.014$ ). Albeit limited researches, how GALNT10 affects malignancy could be conjectured by reviewing mechanisms of other GALNTs. Silencing GALNT7 could dramatically increase immunosuppressive cytokine interleukin-10, and subsequently result in T cell reduction [23]. GALNT7 expression could be regulated by many microRNAs, including miR-30b/30d, miR-34a/c, miR-494, miR-17-3p and so on [23–26]. Wu et al investigated GALNT10 in liver cancer and similar situations were

found [19]. GALNT10 promotes proliferation and increases apoptosis resistance, and meanwhile is regulated by miR-122 [19]. Interestingly, hepatoma cells became more sensitive to sorafenib when GALNT10 was silenced [19]. This is consistent with the findings in this study that patients with low level of GALNT10 responded better to sunitinib or sorafenib.

TKI therapy was an emerging choice for doctors and patients. So far sorafenib and sunitinib are both commonly used for mRCC patients in China. However, similar patients treated with sunitinib or sorafenib may have quite distinct outcomes. Sunitinib was not available here in China a few years ago. As a result, some of the patients were treated with sorafenib instead of sunitinib. Thus separating patients with potential high risk for populations in the wild is an important task for urologists. GALNT10 is capable of distinguishing potential high-risk patients treated with TKIs, especially sunitinib-treated patients. Meanwhile, more PR to sunitinib in patients with low GALNT10 level could be observed compared with sorafenib. Therefore, GALNT10 tends to be more potentially effective in patients treated with sunitinib.

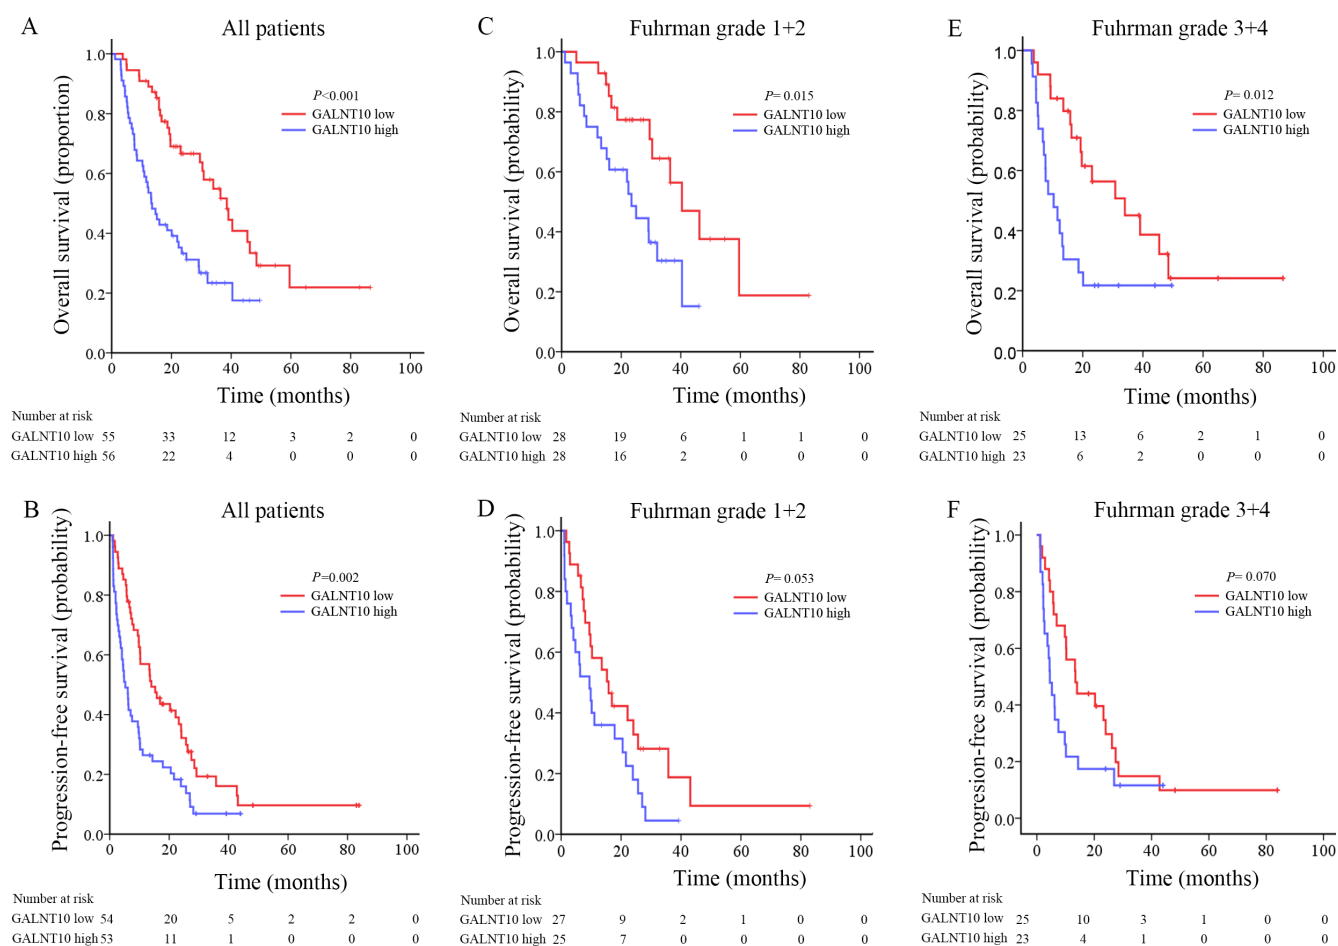

**Figure 1: Kaplan-Meier analyses for prognosis of mRCC patients according to GALNT10 level. (A) OS in all patients; (B) PFS in all patients; (C) OS in stratified low grade patients; (D) PFS in stratified low grade patients; (E) OS in stratified high grade patients; (F) PFS in stratified high grade patients.**

Being retrospective and small sample size are the major limitations of this study. One important reason is the relative short time period since TKI therapy was used in China. In addition, only sunitinib and sorafenib are involved in our study because other targeted agents were then not available. Finally, downstream of GANLT10 has not been fully interpreted, and how the downstream molecules affect cancer biology and the efficacy of TKI therapy needs to be further studied.

In conclusion, these findings suggest that GALNT10 could be applied as a prognostic marker for OS in mRCC patients.

## MATERIALS AND METHODS

### Patients

A total of 138 patients mRCC patients treated with TKIs (sunitinib or sofarenib) were enrolled between Mar 2005 and Jun 2014 at the Department of Urology, Zhongshan Hospital, Fudan University. Ethical approval was authorized by the Clinical Research Ethics Committee of Zhongshan Hospital, Fudan University (B2015-030).

Informed consent was obtained from each patient. After adapted to inclusion and exclusion criteria, 111 patients were taken into analyses. Inclusion criteria were 1). diagnosis of mRCC, 2). treated with sunitinib or sorafenib as first-line systemic therapy, 3). no history of other malignancy and 4). with available fixed tumor tissues. Exclusion criteria were 1). former systemic therapy, 2). necrosis area > 80% in formalin-fixed, paraffin-embedded (FFPE) tissue blocks and 3). loss of follow-up. Baseline information, clinical and laboratory data, TKI therapy-related and survival data were collected from electronic medical records. Metastasis were diagnosed by imaging examination. Histology and nucleus grade were confirmed by a genitourinary pathologist. Tumor stage at operation was reclassified according to the 2010 AJCC TNM classification<sup>20</sup>. Progression definition followed the RECIST 1.1 criteria [27].

### Tissue microarray and immunohistochemistry

Tissue microarrays were manufactured as previously described [28]. The samples were obtained from either curative nephrectomy or cytoreductive nephrectomy. 1:600 diluted primary anti-GALNT10 antibody (Sigma-

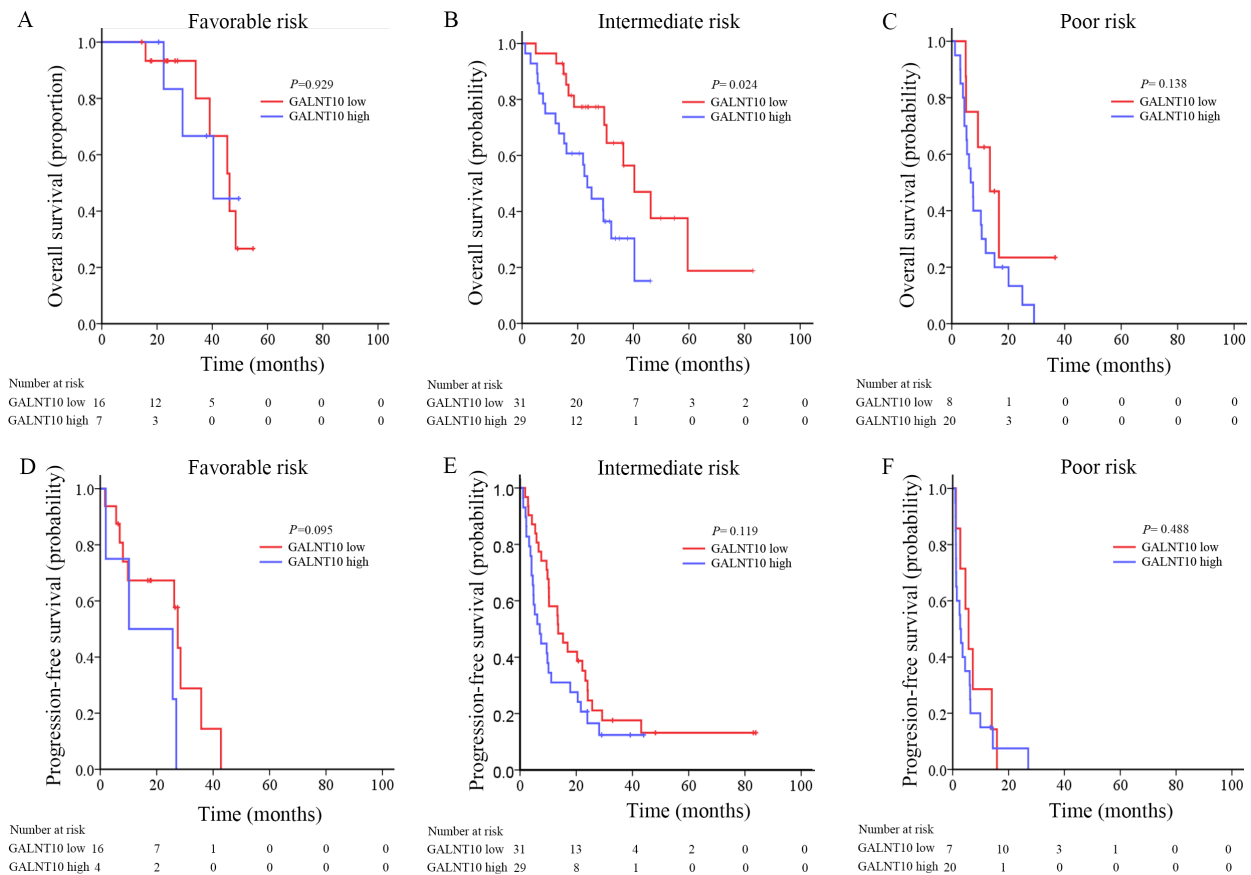

**Figure 2: Kaplan-Meier analyses for prognosis of mRCC patients according to GALNT10 level in different Heng's risk groups. (A) OS in favorable risk patients; (B) OS in intermediate risk patients; (C) OS in poor risk patients; (D) PFS in favorable risk patients; (E) PFS intermediate risk patients; (F) PFS in poor risk patients.**

Aldrich, St Louis, MO, USA) was used in the IHC staining procedure. Operation process was performed as before [29]. Two random shots of each spot were obtained and all pictures were assessed in the semi-quantitative immunoreactivity score (IRS) system. IRS ranged from 0 to 30 which was the multiplication of intensity (0, negative; 1, weak; 2, intermediate; and 3, strong) and positive staining proportion (1 point for each 10% increment; the percentage of positive tumor cells ranged from 1 to 10). The average score of the pictures from one tumor represented the tumor IRS of the patient.

### Statistical

Overall survival (OS) and progression-free survival (PFS) were the primary outcomes. OS was defined as the time span from starting of TKI therapy to death of any

cause. PFS was defined as the time span from starting of TKI therapy to progression date or last follow-up. GraphPad Prism 6 (GraphPad Software Inc., La Jolla, CA, USA) and SPSS 19.0 (SPSS Inc., IL, Chicago, USA) were used for process and evaluation of data. Median cut-off was done for high/low GALNT10 expression level. Connections between GALNT10 expression and clinicopathological characteristics were evaluated by  $\chi^2$  test, Fisher's exact method or Cochran-Mantel-Haenszel  $\chi^2$  test. Kaplan-Meier method and log-rank test were applied to determine the relationship between GALNT10 level and OS and PFS. Cox model based univariate and multivariate analyses were used to determine hazard ratio (HR) and 95% confidence interval (CI). The ROC analyses was performed to evaluate the efficacy of combinational prognostic models. Two tailed  $P < 0.05$  was considered statistically significant.

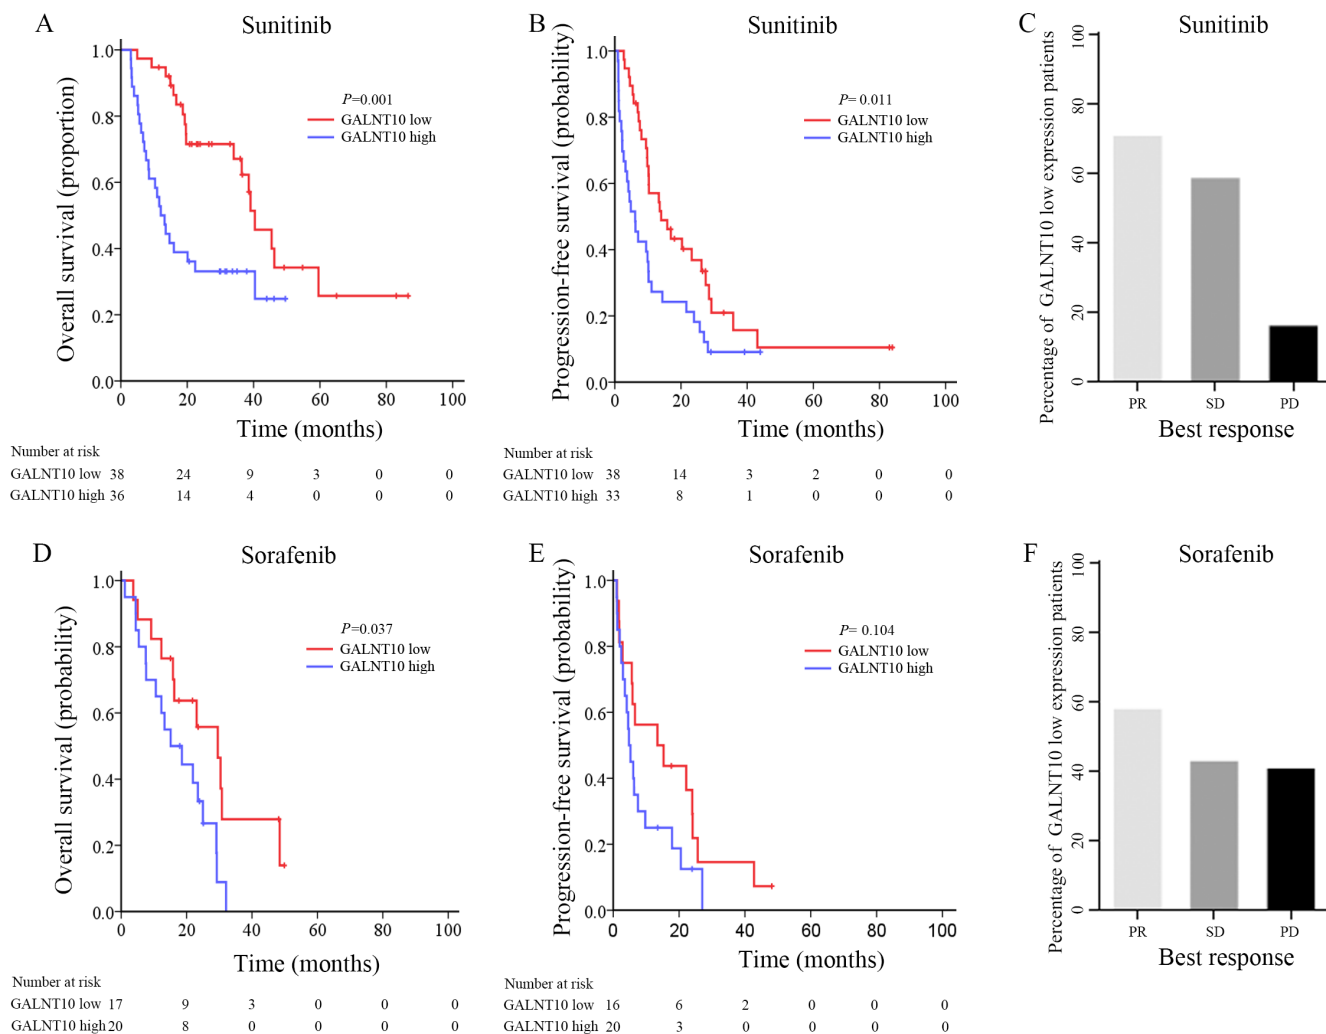

**Figure 3: Survival and disease outcome after TKI therapy.** (A) OS analyses comparing high/low GALNT10 patients treated with sunitinib; (B) PFS analyses comparing high/low GALNT10 patients treated with sunitinib; (C) Percentage of response to sunitinib in low GALNT10 patients; (D) OS analyses comparing high/low GALNT10 patients treated with sorafenib; (E) PFS analyses comparing high/low GALNT10 patients treated with sorafenib; (F) Percentage of response to sorafenib in low GALNT10 patients.

**Table 2: Proportional hazard model for overall survival and recurrence free survival prediction**

| Variables                            | OS (n = 111)         |          | RFS(n = 106)        |          |
|--------------------------------------|----------------------|----------|---------------------|----------|
|                                      | HR (95%CI)           | P-value† | HR (95%CI)          | P-value† |
| Histology                            |                      |          |                     |          |
| Non-ccRCC vs ccRCC                   | 2.395 (1.335–4.297)  | 0.003    | 1.700 (1.001–2.888) | 0.050    |
| Number of metastatic sites           |                      |          |                     |          |
| ≥ 2 vs 1                             | 1.534 (0.925–2.554)  | 0.097    | 2.071 (1.305–3.288) | 0.002    |
| Targeted therapy                     |                      |          |                     |          |
| Sorafenib vs Sunitinib               | 1.296 (0.774–2.171)  | 0.324    | 1.328 (0.843–2.093) | 0.221    |
| Heng's risk group                    |                      |          |                     |          |
| Intermediate vs favorable risk group | 2.163 (1.016–4.608)  | < 0.001  | 1.211 (0.652–2.250) | 0.544    |
| Poor vs favorable risk group         | 6.755 (2.857–15.972) | < 0.001  | 2.707 (1.322–5.543) | 0.006    |
| GALNT10 expression                   |                      |          |                     |          |
| High vs Low                          | 1.938 (1.142–3.289)  | 0.014    | 1.532 (0.974–2.407) | 0.065    |

ECOG PS = Eastern Cooperative Oncology Group performance status; HR = hazard ratio; CI = confidence interval; OS = overall survival; RFS = recurrence free survival; †Data obtained from the Cox proportional hazards model, P-value < 0.05 was regarded as statistically significant.

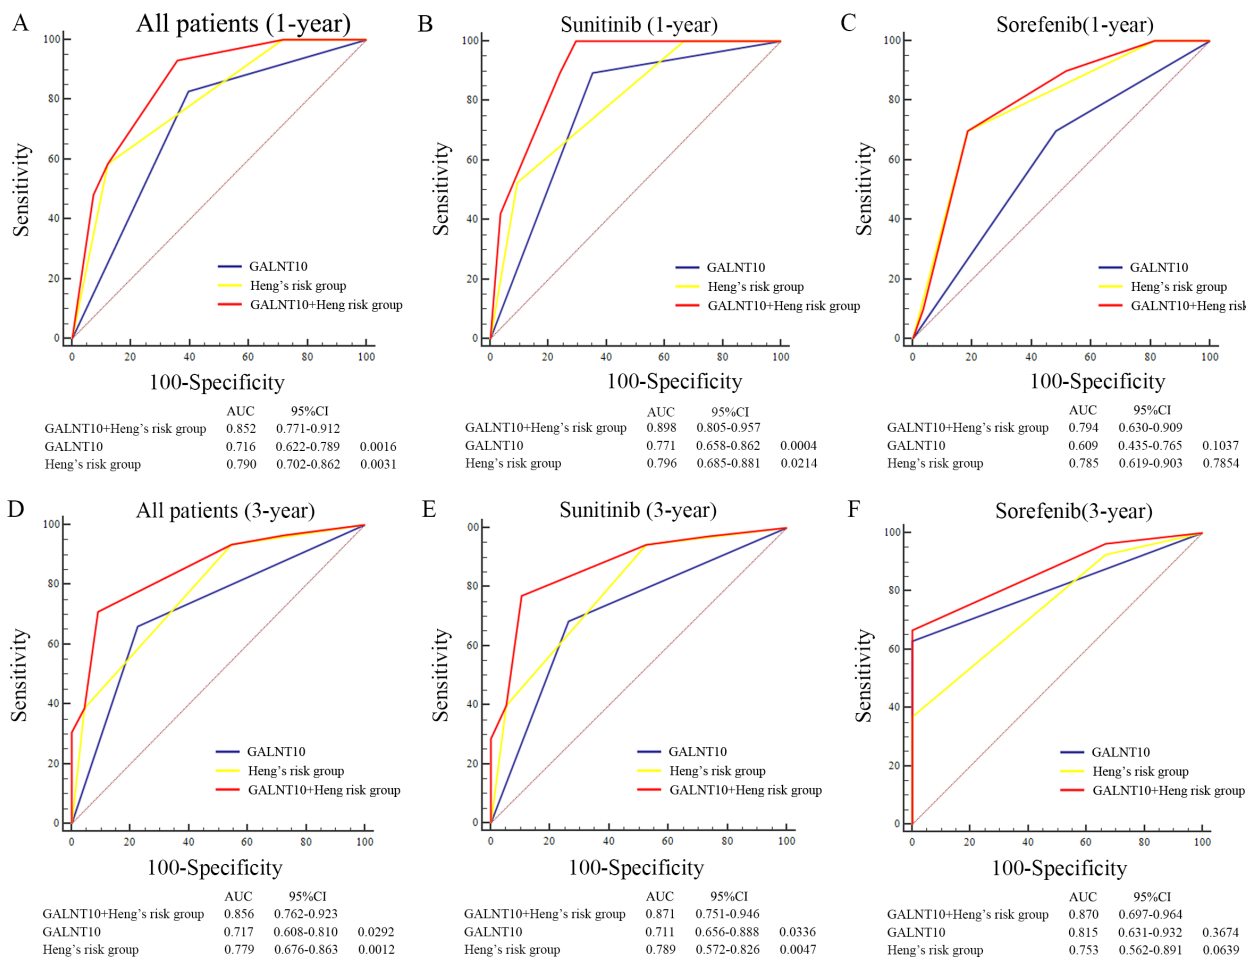

**Figure 4: ROC analyses of predictive models in mRCC patients. (A)** ROC analyses in all patients at 1-year; **(B)** ROC analyses in patients treated with sunitinib at 1-year; **(C)** ROC analyses in patients treated with sorafenib at 1-year; **(D)** ROC analyses in all patients at 3-year; **(E)** ROC analyses in patients treated with sunitinib at 3-year; **(F)** ROC analyses in patients treated with sorafenib at 3-year.

## ACKNOWLEDGMENTS

The authors would like to thank Dr. Yuan Ji, Dr. Jun Hou and Ms. Haiying Zeng (Department of Pathology, Zhongshan Hospital of Fudan University) for diagnosis confirmation and technical assistance.

## CONFLICTS OF INTEREST

The authors declare no conflicts of interest.

## GRANT SUPPORT

This study was funded by grants from National Key Projects for Zhongshan Hospital Science Foundation (2016ZSQN30), Shanghai Municipal Natural Science Foundation (14ZR1406300), Infectious Diseases of China (2012ZX10002012-007, 2016ZX10002018-008), National Natural Science Foundation of China (31100629, 31270863, 81372755, 31470794, 81401988, 81402082, 81402085, 81471621, 81472227, 81472376, 31570803, 81501999, 81671628 and 81672324) and Program for New Century Excellent Talents in University (NCET-13-0146). All these study sponsors have no roles in the study design, in the collection, analyses, and interpretation of data.

## Authors' contributions

L. Liu, Y. Xiong and W. Xi for acquisition of data, analyses and interpretation of data, statistical analyses and drafting of the manuscript; J. Wang, Y. Qu, Z. Lin, X. Chen and J. Yao for technical and material support; J. Xu and J. Guo for study concept and design, analyses and interpretation of data, drafting of the manuscript, obtained funding and study supervision. All authors read and approved the final manuscript.

## REFERENCES

1. Siegel RL, Miller KD, Jemal A. Cancer statistics, 2016. *CA: a cancer journal for clinicians*. 2016; 66:7–30.
2. Kane CJ, Mallin K, Ritchey J, Cooperberg MR, Carroll PR. Renal cell cancer stage migration: analysis of the National Cancer Data Base. *Cancer*. 2008; 113:78–83.
3. Cindolo L, Patard JJ, Chiodini P, Schips L, Ficarra V, Tostain J, de La Taille A, Altieri V, Lobel B, Zigeuner RE, Artibani W, Guille F, Abbou CC, et al. Comparison of predictive accuracy of four prognostic models for nonmetastatic renal cell carcinoma after nephrectomy: a multicenter European study. *Cancer*. 2005; 104:1362–1371.
4. Lam JS, Leppert JT, Figlin RA, Belldegrun AS. Surveillance following radical or partial nephrectomy for renal cell carcinoma. *Current urology reports*. 2005; 6:7–18.
5. McDermott DF, Regan MM, Clark JI, Flaherty LE, Weiss GR, Logan TF, Kirkwood JM, Gordon MS,

- Sosman JA, Ernstoff MS, Tretter CP, Urba WJ, Smith JW, et al. Randomized phase III trial of high-dose interleukin-2 versus subcutaneous interleukin-2 and interferon in patients with metastatic renal cell carcinoma. *Journal of clinical oncology*. 2005; 23:133–141.
6. Fyfe G, Fisher RI, Rosenberg SA, Sznol M, Parkinson DR, Louie AC. Results of treatment of 255 patients with metastatic renal cell carcinoma who received high-dose recombinant interleukin-2 therapy. *Journal of clinical oncology*. 1995; 13:688–696.
7. Escudier B, Eisen T, Stadler WM, Szczylik C, Oudard S, Staehler M, Negrier S, Chevreau C, Desai AA, Rolland F, Demkow T, Hutson TE, Gore M, et al. Sorafenib for treatment of renal cell carcinoma: Final efficacy and safety results of the phase III treatment approaches in renal cancer global evaluation trial. *Journal of clinical oncology*. 2009; 27:3312–3318.
8. Motzer RJ, Hutson TE, Tomczak P, Michaelson MD, Bukowski RM, Rixe O, Oudard S, Negrier S, Szczylik C, Kim ST, Chen I, Bycott PW, Baum CM, et al. Sunitinib versus interferon alfa in metastatic renal-cell carcinoma. *The New England journal of medicine*. 2007; 356:115–124.
9. Sonpavde G, Pond GR, Armstrong AJ, Galsky MD, Leopold L, Wood BA, Wang SL, Paolini J, Chen I, Chow-Maneval E, Mooney DJ, Lechuga M, Smith MR, et al. Radiographic progression by Prostate Cancer Working Group (PCWG)-2 criteria as an intermediate endpoint for drug development in metastatic castration-resistant prostate cancer. *BJU international*. 2014; 114:E25–31.
10. Eichelberg C, Junker K, Ljungberg B, Moch H. Diagnostic and prognostic molecular markers for renal cell carcinoma: a critical appraisal of the current state of research and clinical applicability. *European urology*. 2009; 55:851–863.
11. Brockhausen I. Pathways of O-glycan biosynthesis in cancer cells. *Biochimica et biophysica acta*. 1999; 1473:67–95.
12. Hollingsworth MA, Swanson BJ. Mucins in cancer: protection and control of the cell surface. *Nature reviews Cancer*. 2004; 4:45–60.
13. Yamamoto S, Nakamori S, Tsujie M, Takahashi Y, Nagano H, Dono K, Umeshita K, Sakon M, Tomita Y, Hoshida Y, Aozasa K, Kohno K, Monden M. Expression of uridine diphosphate N-acetyl-alpha-D-galactosamine: polypeptide N-acetylgalactosaminyl transferase 3 in adenocarcinoma of the pancreas. *Pathobiology*. 2004; 71:12–18.
14. Kitada S, Yamada S, Kuma A, Ouchi S, Tasaki T, Nabeshima A, Noguchi H, Wang KY, Shimajiri S, Nakano R, Izumi H, Kohno K, Matsumoto T, et al. Polypeptide N-acetylgalactosaminyl transferase 3 independently predicts high-grade tumours and poor prognosis in patients with renal cell carcinomas. *British journal of cancer*. 2013; 109:472–481.
15. Ishikawa M, Kitayama J, Nariko H, Kohno K, Nagawa H. The expression pattern of UDP-N-acetyl-alpha-d-galactosamine: polypeptide N-acetylgalactosaminyl transferase-3 in early gastric carcinoma. *Journal of surgical oncology*. 2004; 86:28–33.



16. Gu C, Oyama T, Osaki T, Li J, Takenoyama M, Izumi H, Sugio K, Kohno K, Yasumoto K. Low expression of polypeptide GalNAc N-acetylgalactosaminyl transferase-3 in lung adenocarcinoma: impact on poor prognosis and early recurrence. *British journal of cancer*. 2004; 90:436–442.
17. Berois N, Mazal D, Ubillos L, Trajtenberg F, Nicolas A, Sastre-Garau X, Magdelenat H, Osinaga E. UDP-N-acetyl-D-galactosamine: polypeptide N-acetylgalactosaminyl transferase-6 as a new immunohistochemical breast cancer marker. *The journal of histochemistry and cytochemistry*. 2006; 54:317–328.
18. Wu Q, Yang L, Liu H, Zhang W, Le X, Xu J. Elevated Expression of N-Acetylgalactosaminyltransferase 10 Predicts Poor Survival and Early Recurrence of Patients with Clear-Cell Renal Cell Carcinoma. *Annals of surgical oncology*. 2015; 22:2446–2453.
19. Wu Q, Liu HO, Liu YD, Liu WS, Pan D, Zhang WJ, Yang L, Fu Q, Xu JJ, Gu JX. Decreased expression of hepatocyte nuclear factor 4alpha (Hnf4alpha)/microRNA-122 (miR-122) axis in hepatitis B virus-associated hepatocellular carcinoma enhances potential oncogenic GALNT10 protein activity. *The Journal of biological chemistry*. 2015; 290:1170–1185.
20. Cossu-Rocca P, Muroli MR, Sanges F, Sotgiu G, Asunis A, Tanca L, Onnis D, Pira G, Manca A, Dore S, Uras MG, Ena S, De Miglio MR. EGFR kinase-dependent and kinase-independent roles in clear cell renal cell carcinoma. *American journal of cancer research*. 2016; 6:71–83.
21. Ten Hagen KG, Fritz TA, Tabak LA. All in the family: the UDP-GalNAc: polypeptide N-acetylgalactosaminyl transferases. *Glycobiology*. 2003; 13:1R-16R.
22. Cheng L, Tachibana K, Zhang Y, Guo J, Kahori Tachibana K, Kameyama A, Wang H, Hiruma T, Iwasaki H, Togayachi A, Kudo T, Narimatsu H. Characterization of a novel human UDP-GalNAc transferase, pp-GalNAc-T10. *FEBS letters*. 2002; 531:115–121.
23. Gaziel-Sovran A, Segura MF, Di Micco R, Collins MK, Hanniford D, Vega-Saenz de Miera E, Rakus JF, Dankert JF, Shang S, Kerbel RS, Bhardwaj N, Shao Y, Darvishian F, et al. miR-30b/30d regulation of GalNAc transferases enhances invasion and immunosuppression during metastasis. *Cancer cell*. 2011; 20:104–118.
24. Li W, Ma H, Sun J. MicroRNA34a/c function as tumor suppressors in Hep2 laryngeal carcinoma cells and may reduce GALNT7 expression. *Molecular medicine reports*. 2014; 9:1293–1298.
25. Nie GH, Luo L, Duan HF, Li XQ, Yin MJ, Li Z, Zhang W. GALNT7, a target of miR-494, participates in the oncogenesis of nasopharyngeal carcinoma. *Tumour biology*. 2016; 37:4559–4567.
26. Shan SW, Fang L, Shatseva T, Rutnam ZJ, Yang X, Du W, Lu WY, Xuan JW, Deng Z, Yang BB. Mature miR-17-5p and passenger miR-17-3p induce hepatocellular carcinoma by targeting PTEN, GalNT7 and vimentin in different signal pathways. *Journal of cell science*. 2013; 126:1517–1530.
27. Eisenhauer EA, Therasse P, Bogaerts J, Schwartz LH, Sargent D, Ford R, Dancey J, Arbuck S, Gwyther S, Mooney M, Rubinstein L, Shankar L, Dodd L, et al. New response evaluation criteria in solid tumours: revised RECIST guideline (version 1.1). *European journal of cancer (Oxford, England : 1990)*. 2009; 45:228–247.
28. Zhu XD, Zhang JB, Zhuang PY, Zhu HG, Zhang W, Xiong YQ, Wu WZ, Wang L, Tang ZY, Sun HC. High expression of macrophage colony-stimulating factor in peritumoral liver tissue is associated with poor survival after curative resection of hepatocellular carcinoma. *Journal of clinical oncology*. 2008; 26:2707–2716.
29. Wang J, Liu L, Qu Y, Xi W, Xia Y, Bai Q, Xiong Y, Long Q, Xu J, Guo J. Prognostic Value of SETD2 Expression in Patients with Metastatic Renal Cell Carcinoma Treated with Tyrosine Kinase Inhibitors. *The Journal of urology*. 2016.
